# Supplementary material for: The CU Airborne MAX-DOAS instrument: vertical profiling of aerosol extinction and trace gases
Source: Copernicus journal article supplement (doi:10.5194/amt-6-719-2013), 2013-03-14
Supplement: Supplementary file 1 [file amt-6-719-2013-supplement.pdf]

## Supplementary Information

### The CU Airborne MAX-DOAS instrument: vertical profiling of aerosol extinction and trace gases

Sunil Baidar<sup>1,2</sup>, Hilke Oetjen<sup>1#</sup>, Sean Coburn<sup>1</sup>, Barbara Dix<sup>1</sup>, Ivan Ortega<sup>1</sup>, Roman Sinreich<sup>1</sup>, and Rainer Volkamer<sup>1,2,\*</sup>

\*Corresponding author email: [rainer.volkamer@colorado.edu](mailto:rainer.volkamer@colorado.edu)

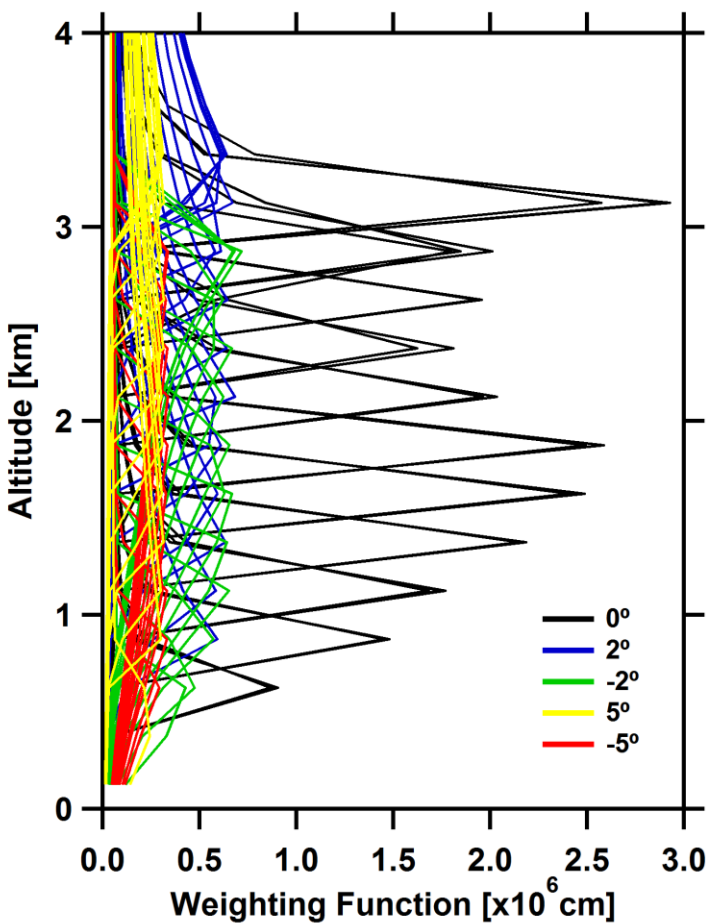

*Fig. S1:* Weighting function calculated at 455 nm using McArtim for CHOCHO vertical profile retrievals for RF#46 on 16 July 2010.

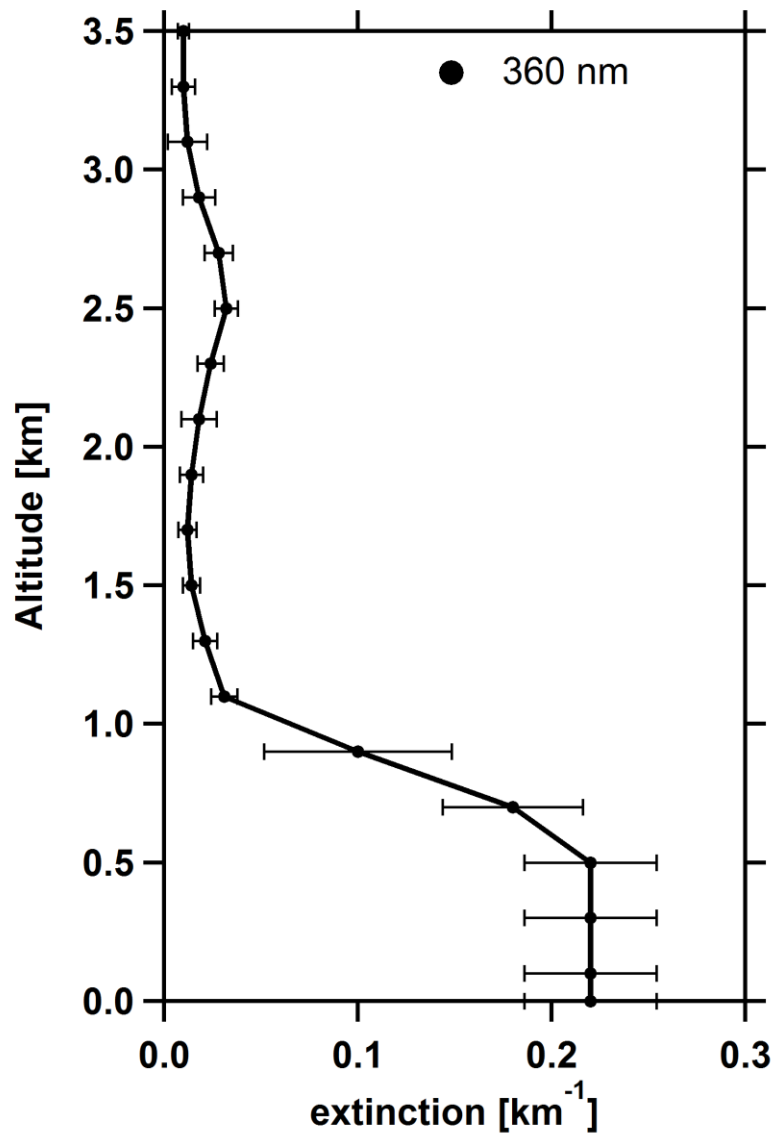

*Fig. S2:* Aerosol extinction coefficient profile retrieved at 360 nm using O<sub>4</sub> dSCD measurements at 360 nm for the above mentioned flight.
